# Supplementary material for: Exceptional sensitivity to the synthetic approach and halogen substituent for Zn(ii) coordination assemblies with 5-halonicotinic acids
Source: Royal Society of Chemistry journal article supplement (doi:10.1039/c5dt00420a), 2015-01-01
Supplement: c5dt00420a1.pdf [file c5dt00420a1.pdf]

**Exceptional sensitivity to synthetic approach and halogen  
substituent for Zn(II) coordination assemblies with  
5-halonicotinic acids**

Cheng-Peng Li, Jing Chen, Yu-Hai Mu, and Miao Du\*

*College of Chemistry, Tianjin Key Laboratory of Structure and Performance for Functional Molecules,  
MOE Key Laboratory of Inorganic-Organic Hybrid Functional Material Chemistry, Tianjin Normal Uni-  
versity, Tianjin 300387, P. R. China*

\* Corresponding author. E-mail: dumiao@public.tpt.tj.cn

**Table S1** Crystal data and structural refinement summary for complexes **1–7**

|                                                                                           | <b>1</b>                                                                       | <b>2</b>                                                                                       | <b>3</b>                                                                          | <b>4</b>                                                                                      | <b>5</b>                                                                                           | <b>6</b>                                                                          | <b>7</b>                                                                             |
|-------------------------------------------------------------------------------------------|--------------------------------------------------------------------------------|------------------------------------------------------------------------------------------------|-----------------------------------------------------------------------------------|-----------------------------------------------------------------------------------------------|----------------------------------------------------------------------------------------------------|-----------------------------------------------------------------------------------|--------------------------------------------------------------------------------------|
| Chemical formula                                                                          | C <sub>12</sub> H <sub>6</sub> F <sub>2</sub> N <sub>2</sub> O <sub>4</sub> Zn | C <sub>24</sub> H <sub>26</sub> Cl <sub>4</sub> N <sub>4</sub> O <sub>15</sub> Zn <sub>2</sub> | C <sub>12</sub> H <sub>9</sub> Cl <sub>2</sub> N <sub>2</sub> O <sub>5.5</sub> Zn | C <sub>24</sub> H <sub>14</sub> Cl <sub>4</sub> N <sub>4</sub> O <sub>9</sub> Zn <sub>2</sub> | C <sub>26.5</sub> H <sub>24</sub> Br <sub>4</sub> N <sub>4</sub> O <sub>11.5</sub> Zn <sub>2</sub> | C <sub>24</sub> H <sub>22</sub> Br <sub>4</sub> N <sub>4</sub> O <sub>12</sub> Zn | C <sub>12</sub> H <sub>8.3</sub> Br <sub>2</sub> N <sub>2</sub> O <sub>5.15</sub> Zn |
| Formula Mass                                                                              | 345.56                                                                         | 883.07                                                                                         | 405.48                                                                            | 774.93                                                                                        | 1032.88                                                                                            | 943.47                                                                            | 488.10                                                                               |
| Crystal system                                                                            | Orthorhombic                                                                   | Monoclinic                                                                                     | Monoclinic                                                                        | Monoclinic                                                                                    | Monoclinic                                                                                         | Monoclinic                                                                        | Monoclinic                                                                           |
| <i>a</i> (Å)                                                                              | 12.2658(16)                                                                    | 14.8972(5)                                                                                     | 7.7158(8)                                                                         | 12.0840(17)                                                                                   | 14.910(3)                                                                                          | 15.3861(15)                                                                       | 7.782(5)                                                                             |
| <i>b</i> (Å)                                                                              | 20.425(3)                                                                      | 16.8530(4)                                                                                     | 7.7397(8)                                                                         | 9.8218(14)                                                                                    | 17.044(3)                                                                                          | 6.8845(7)                                                                         | 7.787(5)                                                                             |
| <i>c</i> (Å)                                                                              | 9.6121(16)                                                                     | 14.5964(5)                                                                                     | 25.946(3)                                                                         | 11.9104(16)                                                                                   | 14.696(3)                                                                                          | 29.387(3)                                                                         | 26.565(17)                                                                           |
| $\beta$ (°)                                                                               | 90.00                                                                          | 119.614(5)                                                                                     | 98.273(2)                                                                         | 94.035(3)                                                                                     | 120.49                                                                                             | 90.112(2)                                                                         | 96.944(13)                                                                           |
| Unit cell volume (Å <sup>3</sup> )                                                        | 2408.1(6)                                                                      | 3185.92(17)                                                                                    | 1533.3(3)                                                                         | 1410.1(3)                                                                                     | 3218.4(10)                                                                                         | 3112.9(5)                                                                         | 1598.0(18)                                                                           |
| Space group                                                                               | <i>Fdd2</i>                                                                    | <i>C2/c</i>                                                                                    | <i>P2/c</i>                                                                       | <i>C2/c</i>                                                                                   | <i>C2/c</i>                                                                                        | <i>P2/c</i>                                                                       | <i>P2/c</i>                                                                          |
| <i>Z</i>                                                                                  | 8                                                                              | 4                                                                                              | 1                                                                                 | 2                                                                                             | 4                                                                                                  | 4                                                                                 | 4                                                                                    |
| $\mu$ (mm <sup>-1</sup> )                                                                 | 2.084                                                                          | 5.646                                                                                          | 1.756                                                                             | 2.140                                                                                         | 6.524                                                                                              | 5.990                                                                             | 6.561                                                                                |
| No. of reflections measured                                                               | 4323                                                                           | 5918                                                                                           | 11194                                                                             | 5127                                                                                          | 9114                                                                                               | 18502                                                                             | 8192                                                                                 |
| No. of independent reflections                                                            | 1486                                                                           | 3074                                                                                           | 3848                                                                              | 1756                                                                                          | 2847                                                                                               | 7290                                                                              | 3786                                                                                 |
| <i>R</i> <sub>int</sub>                                                                   | 0.0434                                                                         | 0.0322                                                                                         | 0.0387                                                                            | 0.0319                                                                                        | 0.0428                                                                                             | 0.0420                                                                            | 0.0837                                                                               |
| Final <i>R</i> values ( <i>I</i> > 2σ( <i>I</i> ))                                        | 0.0265                                                                         | 0.0417                                                                                         | 0.0413                                                                            | 0.0326                                                                                        | 0.0305                                                                                             | 0.0431                                                                            | 0.1101                                                                               |
| Final <i>R</i> <sub>w</sub> ( <i>F</i> <sup>2</sup> ) values ( <i>I</i> > 2σ( <i>I</i> )) | 0.0618                                                                         | 0.1197                                                                                         | 0.1047                                                                            | 0.0780                                                                                        | 0.0691                                                                                             | 0.0910                                                                            | 0.2363                                                                               |
| Final <i>R</i> values (all data)                                                          | 0.0278                                                                         | 0.0468                                                                                         | 0.0554                                                                            | 0.0413                                                                                        | 0.0385                                                                                             | 0.1012                                                                            | 0.1467                                                                               |
| Final <i>R</i> <sub>w</sub> ( <i>F</i> <sup>2</sup> ) values (all data)                   | 0.0623                                                                         | 0.1246                                                                                         | 0.1112                                                                            | 0.0826                                                                                        | 0.0717                                                                                             | 0.1086                                                                            | 0.2508                                                                               |
| Goodness of fit on <i>F</i> <sup>2</sup>                                                  | 1.103                                                                          | 1.072                                                                                          | 1.069                                                                             | 1.133                                                                                         | 1.089                                                                                              | 1.010                                                                             | 1.095                                                                                |

**Table S2** Selective bond lengths (Å) and angles (°) for complexes **1–7**

---

| <b>1</b>    |            |             |           |
|-------------|------------|-------------|-----------|
| Zn1–O1      | 2.0168(19) | Zn1–N1B     | 2.099(2)  |
| Zn1–O2A     | 2.401(2)   |             |           |
| O1–Zn1–O1A  | 150.73(12) | O1A–Zn1–N1B | 101.75(9) |
| O1–Zn1–N1B  | 96.01(8)   | O1A–Zn1–O2  | 98.58(8)  |
| O1–Zn1–O2   | 58.95(8)   | N1B–Zn1–O2  | 153.71(7) |
| N1C–Zn1–O2  | 89.36(8)   | O2–Zn1–O2A  | 87.00(11) |
| N1B–Zn1–N1C | 104.77(12) |             |           |
| <b>2</b>    |            |             |           |
| Zn1–O1      | 2.087(2)   | Zn1–O2A     | 2.104(2)  |
| Zn1–O5      | 2.1333(16) | Zn1–N1B     | 2.140(2)  |
| Zn1–N2C     | 2.184(2)   | Zn1–O3      | 2.192(2)  |
| O1–Zn1–O2A  | 98.59(9)   | O1–Zn1–O5   | 88.32(7)  |
| O2A–Zn1–O5  | 90.36(9)   | O1–Zn1–N1B  | 93.13(9)  |
| O2A–Zn1–N1B | 83.60(9)   | O5–Zn1–N1B  | 173.93(8) |
| O1–Zn1–N2C  | 88.50(9)   | O2A–Zn1–N2C | 170.25(9) |
| O5–Zn1–N2C  | 96.57(9)   | N1B–Zn1–N2C | 89.36(9)  |
| O1–Zn1–O3   | 175.30(9)  | O2A–Zn1–O3  | 83.37(9)  |
| O5–Zn1–O3   | 87.39(7)   | N1B–Zn1–O3  | 91.33(9)  |
| N2C–Zn1–O3  | 90.07(9)   |             |           |
| <b>3</b>    |            |             |           |
| Zn1–O4A     | 2.027(2)   | Zn1–O2      | 2.041(2)  |
| Zn1–N2      | 2.071(2)   | Zn1–N1B     | 2.078(2)  |
| Zn1–O1      | 2.356(2)   | Zn1–O3A     | 2.361(3)  |

|             |            |             |            |
|-------------|------------|-------------|------------|
| O4A–Zn1–O2  | 147.76(11) | O4–Zn1–N2   | 94.76(9)   |
| O2–Zn1–N2   | 109.94(10) | O4A–Zn1–N1B | 102.40(10) |
| O2–Zn1–N1B  | 94.77(9)   | N2–Zn1–N1B  | 97.52(9)   |
| O4A–Zn1–O1  | 100.15(10) | O2–Zn1–O1   | 58.98(8)   |
| N2–Zn1–O1   | 93.95(9)   | N1B–Zn1–O1  | 153.68(9)  |
| O4A–Zn1–O3A | 58.51(9)   | O2–Zn1–O3A  | 94.20(10)  |
| N2–Zn1–O3A  | 153.08(9)  | N1B–Zn1–O3A | 91.96(10)  |
| O1–Zn1–O3A  | 88.33(9)   |             |            |

4

|             |            |            |            |
|-------------|------------|------------|------------|
| Zn1–O2A     | 2.041(5)   | Zn1–O1B    | 2.351(5)   |
| Zn1–N1      | 2.099(4)   |            |            |
| O2A–Zn1–O2B | 156.1(3)   | O2A–Zn1–N1 | 94.86(18)  |
| O2B–Zn1–N1  | 101.28(19) | N1C–Zn1–N1 | 94.9(2)    |
| O2A–Zn1–O1B | 103.4(2)   | N1–Zn1–O1B | 90.54(17)  |
| O2A–Zn1–O1A | 59.33(19)  | N1–Zn1–O1A | 154.20(17) |
| O1B–Zn1–O1A | 95.4(2)    |            |            |

5

|             |            |             |            |
|-------------|------------|-------------|------------|
| Zn1–O4A     | 2.095(2)   | Zn1–O3B     | 2.220(3)   |
| Zn1–O5      | 2.116(2)   | Zn1–N2      | 2.132(3)   |
| Zn1–N1      | 2.175(3)   | Zn1–O2C     | 2.220(3)   |
| O4A–Zn1–O3B | 99.51(10)  | O4A–Zn1–O5  | 87.97(8)   |
| O3B–Zn1–O5  | 90.15(10)  | O4A–Zn1–N2  | 93.69(11)  |
| O3B–Zn1–N2  | 83.63(11)  | O5–Zn1–N2   | 173.74(11) |
| O4A–Zn1–N1  | 88.40(11)  | O3B–Zn1–N1  | 169.59(10) |
| O5–Zn1–N1   | 96.93(11)  | N2–Zn1–N1   | 89.15(12)  |
| O4A–Zn1–O2C | 174.21(10) | O3B–Zn1–O2C | 82.95(10)  |
| O5–Zn1–O2C  | 86.78(8)   | N2–Zn1–O2C  | 91.78(11)  |
| N1–Zn1–O2C  | 89.81(11)  |             |            |

## 6

|            |            |            |            |
|------------|------------|------------|------------|
| Zn1–O5     | 2.046(3)   | Zn1–O6     | 2.071(3)   |
| Zn1–N1     | 2.239(3)   | Zn2–N2     | 2.176(3)   |
| Zn2–O8     | 2.106(3)   | Zn2–O7     | 2.111(3)   |
| O5–Zn1–O5A | 89.94(19)  | O5A–Zn1–O6 | 177.43(12) |
| O5–Zn1–O6  | 90.05(16)  | O6A–Zn1–O6 | 90.1(3)    |
| O5–Zn1–N1A | 89.67(12)  | O5–Zn1–N1  | 92.88(13)  |
| O6–Zn1–N1  | 87.77(13)  | O6A–Zn1–N1 | 89.68(13)  |
| N1A–Zn1–N1 | 176.40(19) | O8–Zn2–O7  | 91.94(12)  |
| N2–Zn2–O7  | 88.07(12)  | O8–Zn2–N2  | 92.15(12)  |

## 7

|             |          |             |           |
|-------------|----------|-------------|-----------|
| Zn1–O4B     | 2.026(9) | Zn1–O2A     | 2.358(9)  |
| Zn1–N2      | 2.101(8) | Zn1–N1      | 2.089(10) |
| Zn1–O1A     | 2.063(9) | Zn1–O3B     | 2.409(11) |
| O4B–Zn1–O1A | 147.9(4) | O4B–Zn1–N1  | 95.2(4)   |
| O1A–Zn1–N1  | 109.7(4) | O4B–Zn1–N2  | 103.1(4)  |
| O1A–Zn1–N2  | 94.2(3)  | N2–Zn1–N1   | 96.3(4)   |
| O4B–Zn1–O2A | 99.3(4)  | O2A–Zn1–O1A | 59.7(3)   |
| N1–Zn1–O2A  | 95.0(4)  | N2–Zn1–O2A  | 153.8(3)  |
| O4B–Zn1–O3B | 58.5(4)  | O1A–Zn1–O3B | 95.1(4)   |
| N1–Zn1–O3B  | 153.7(4) | N2–Zn1–O3B  | 90.5(4)   |
| O2A–Zn1–O3B | 89.7(4)  |             |           |

---

Symmetry codes: A =  $-x + 1/2, -y + 1/2, z$ ; B =  $x + 1/2, y, z + 1/2$ ; C =  $-x, -y + 1/2, z + 1/2$  for **1**; A =  $-x + 1, y, -z + 1/2$ ; B =  $x, -y, z + 1/2$ ; C =  $x - 1/2, -y + 1/2, z - 1/2$  for **2**; A =  $x + 1, y, z$ ; B =  $x, y - 1, z$  for **3**; A =  $x + 1/2, y + 1/2, z$ ; B =  $-x + 1/2, y + 1/2, -z + 1/2$ ; C =  $-x + 1, y, -z + 1/2$  for **4**; A =  $x - 1/2, -y + 1/2, z - 1/2$ ; B =  $-x + 1/2, -y + 1/2, -z + 1$ ; C =  $x, -y, z + 1/2$  for **5**; A =  $-x, y, -z + 3/2$  for **6**; A =  $x, y + 1, z$ ; B =  $x - 1, y, z$  for **7**.

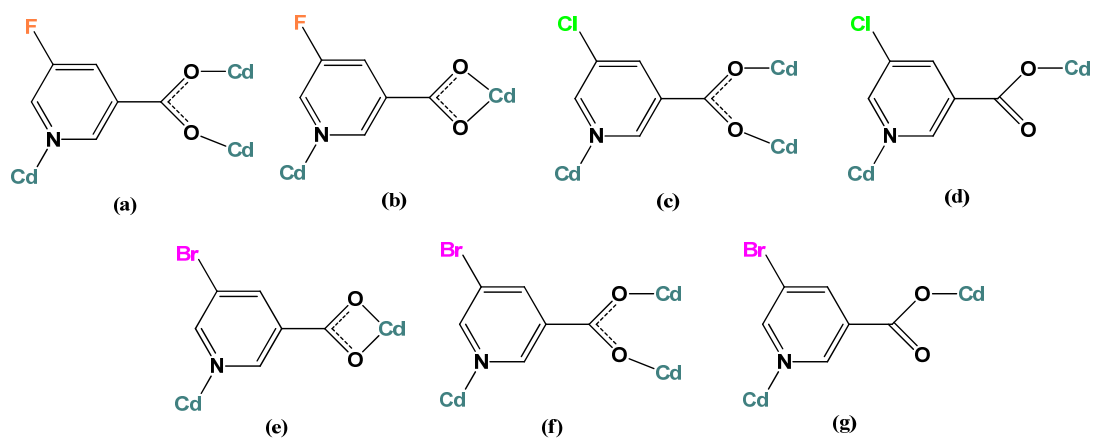

**Chart S1** Coordination modes of HL-X ligands in reported Cd(II) complexes.

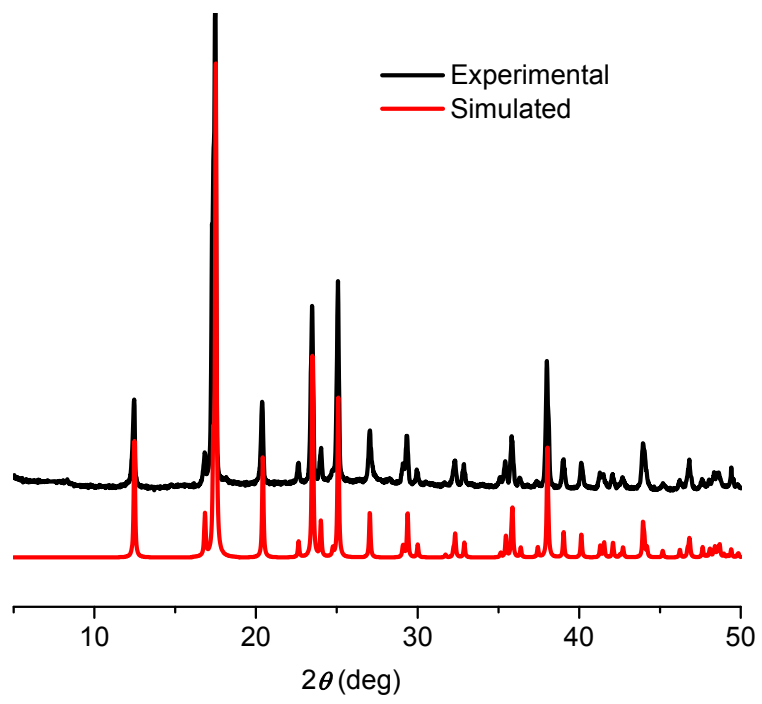

(a)

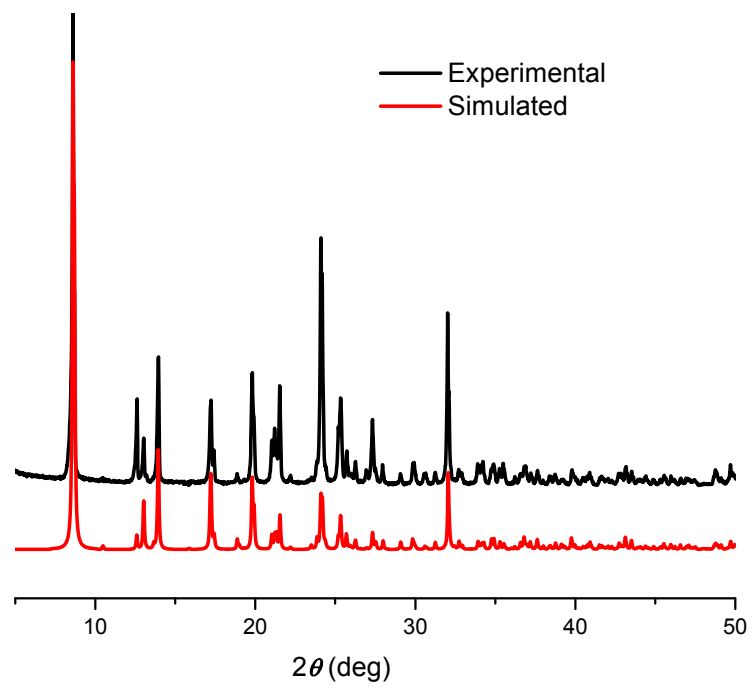

(b)

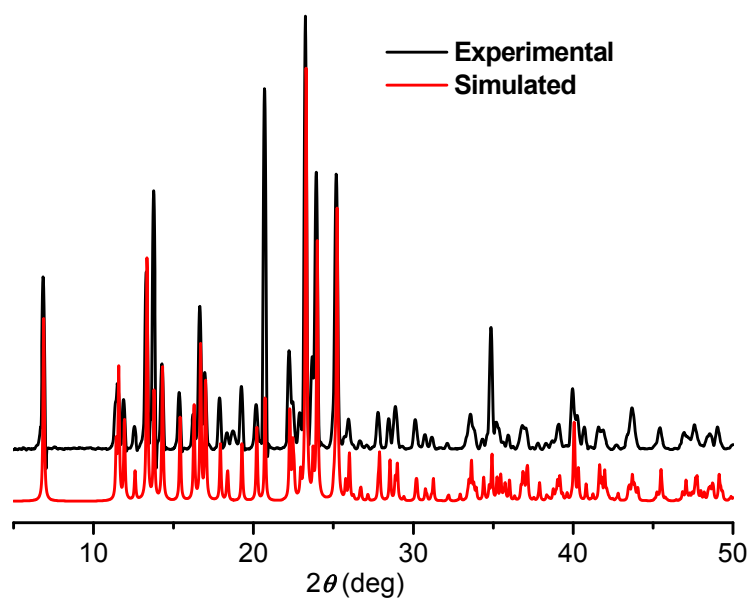

(c)

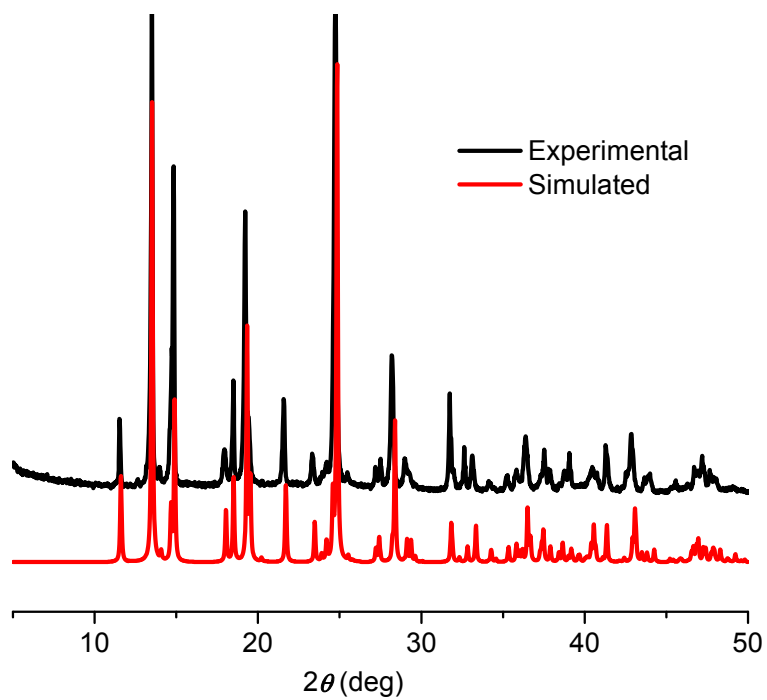

(d)



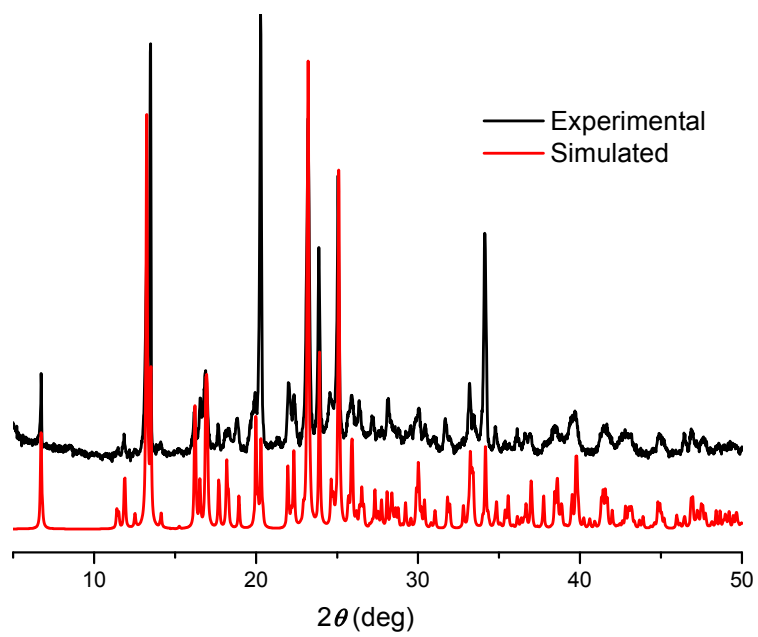

(e)

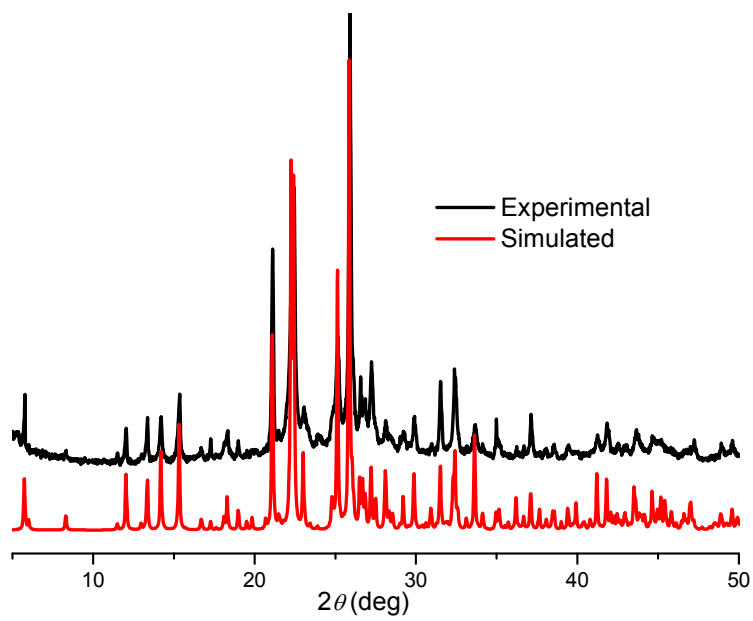

(f)

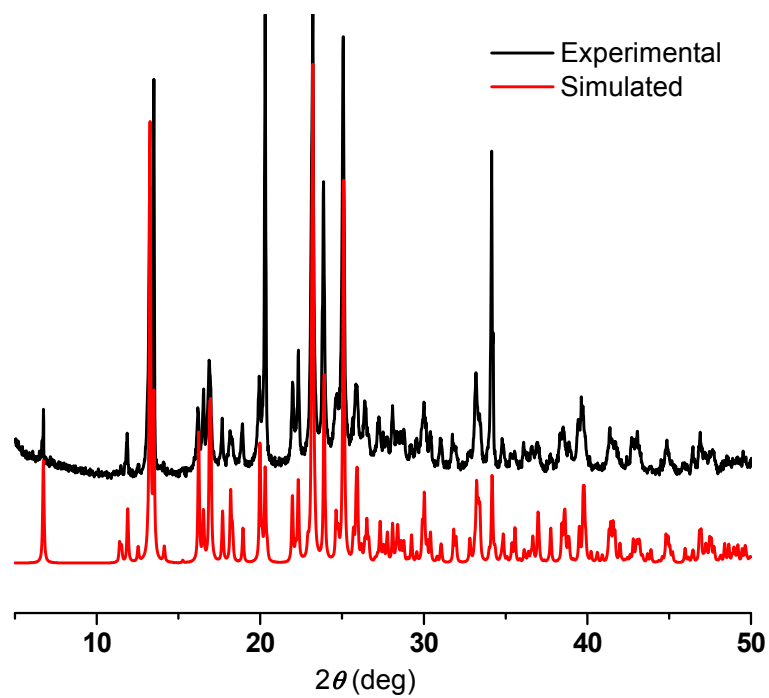

(g)

**Fig. S1** Powder X-ray diffraction (PXRD) patterns for complexes 1–7 (a–g).

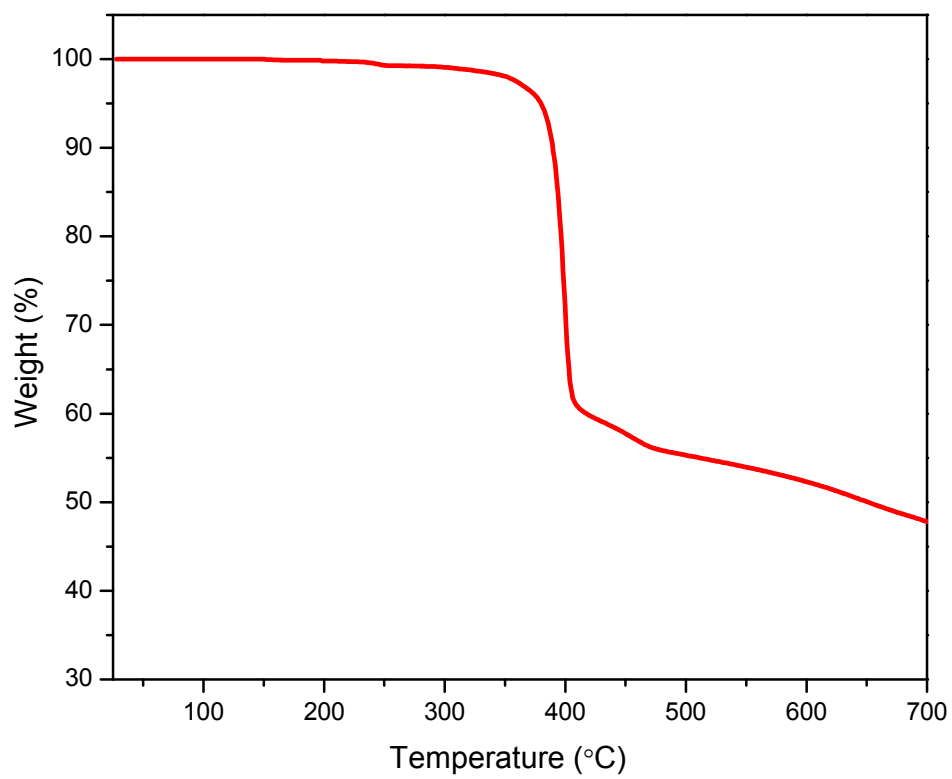

(a)

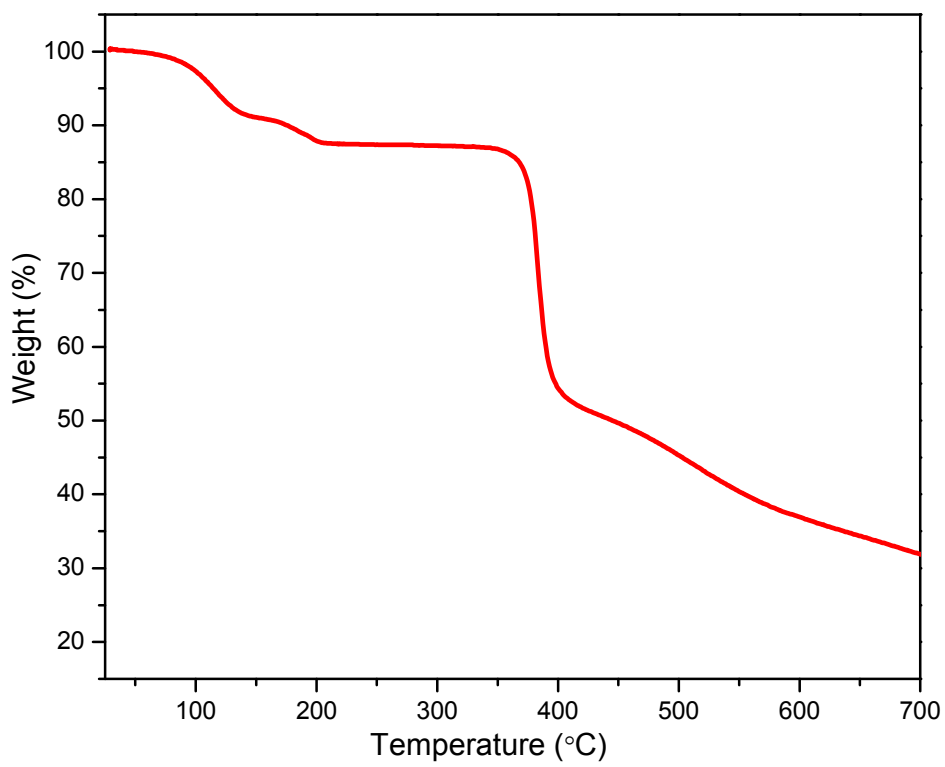

(b)

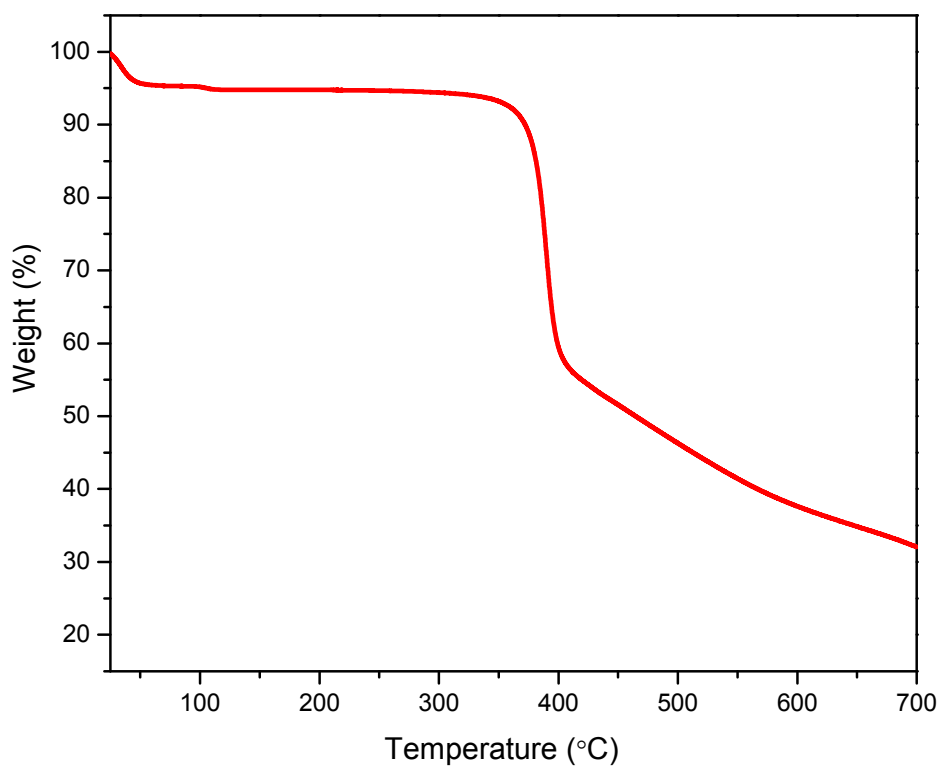

(c)

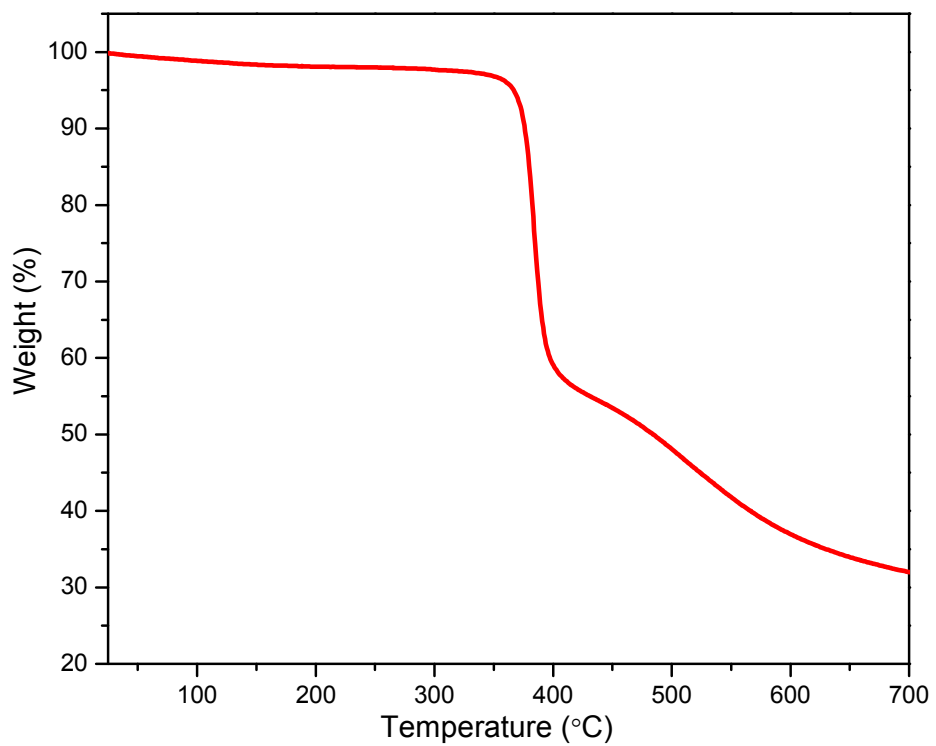

(d)

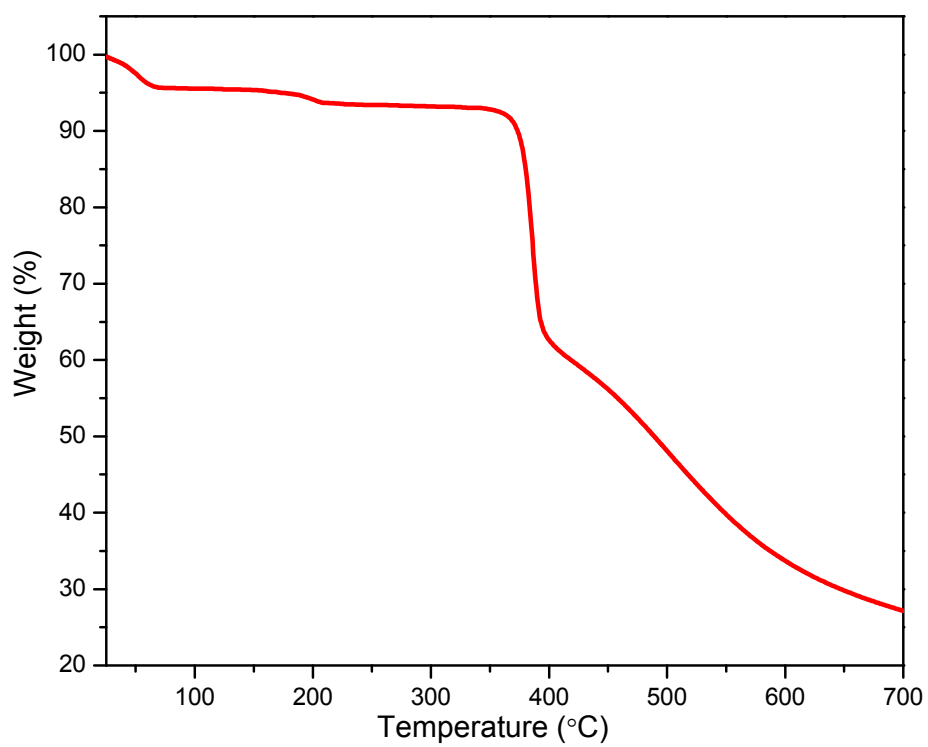

(e)

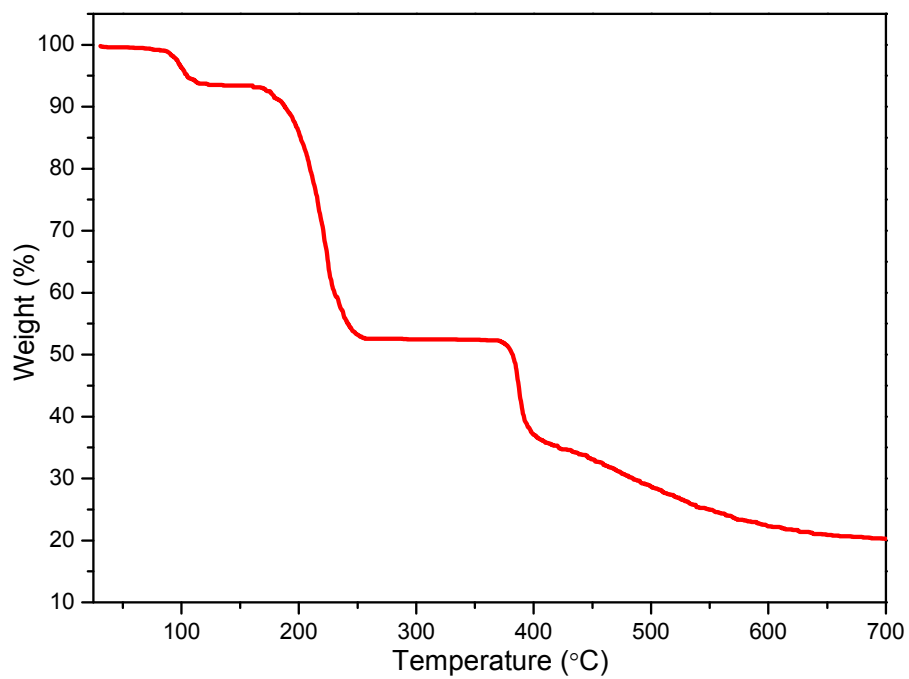

(f)

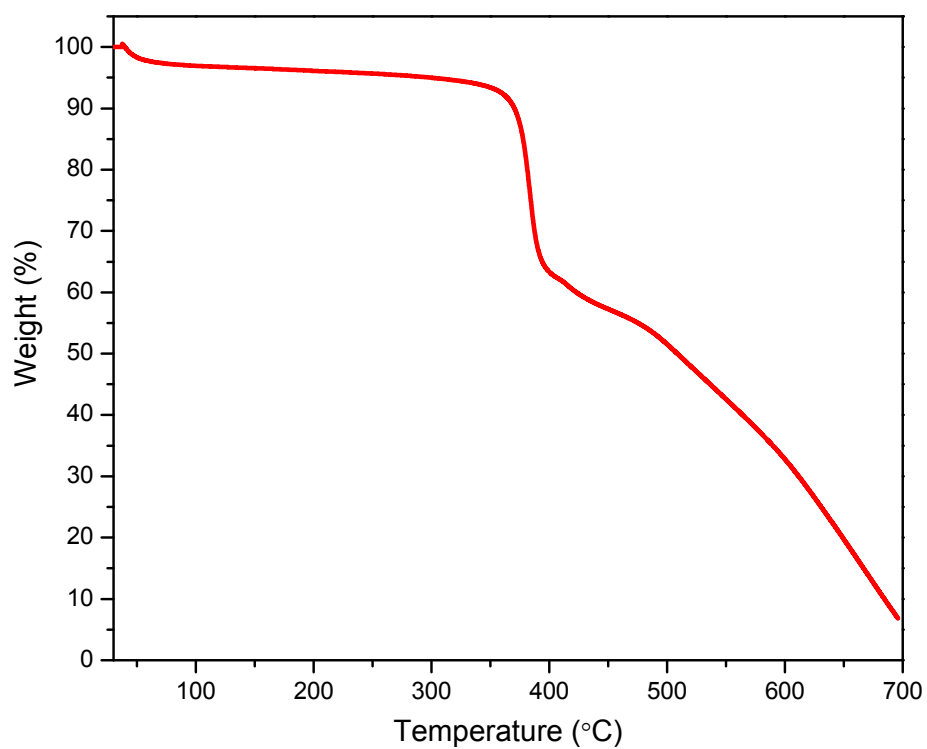

(g)

**Fig. S2** Thermogravimetric analysis (TGA) curves for complexes **1–7** (a–g).
